# Supplementary material for: The role of crystallinity of the Nb2O5 blocking layer on the performance of dye-sensitized solar cells
Source: Royal Society of Chemistry journal article supplement (doi:10.1039/c6nj01133k), 2016-01-01
Supplement: c6nj01133k1.pdf [file c6nj01133k1.pdf]

Electronic Supplementary Information

Role of Crystallinity of the Nb<sub>2</sub>O<sub>5</sub> Blocking Layer on the Performance of Dye-sensitized Solar Cells

*S. Suresh<sup>a</sup>, T. G. Deepak<sup>b</sup>, Chengshi N.I<sup>c</sup>, C.O.Sreekala<sup>d</sup>, M.Satyanarayana<sup>a</sup>, A. Sreekumaran Nair<sup>b\*</sup> and V.P. Mahadevan Pillai<sup>a</sup>*

a - Department of optoelectronics, University of Kerala, Kariavattom, Thiruvananthapuram, Kerala, India-695581

b - Amrita Centre for Nanosciences & Nano solar, Amrithapuri, Kochi, Kerala, India

c - School of Chemistry, University of St Andrews, St Andrews, Fife KY16 9ST, U.K

d - School of Biotechnology, Amrita Vishwa Vidyapeetham University, Amritapuri Campus, Kollam, Kerala, India-690525

\*Corresponding authors. E-mail: [sreekumarannair@aims.amrita.edu](mailto:sreekumarannair@aims.amrita.edu)

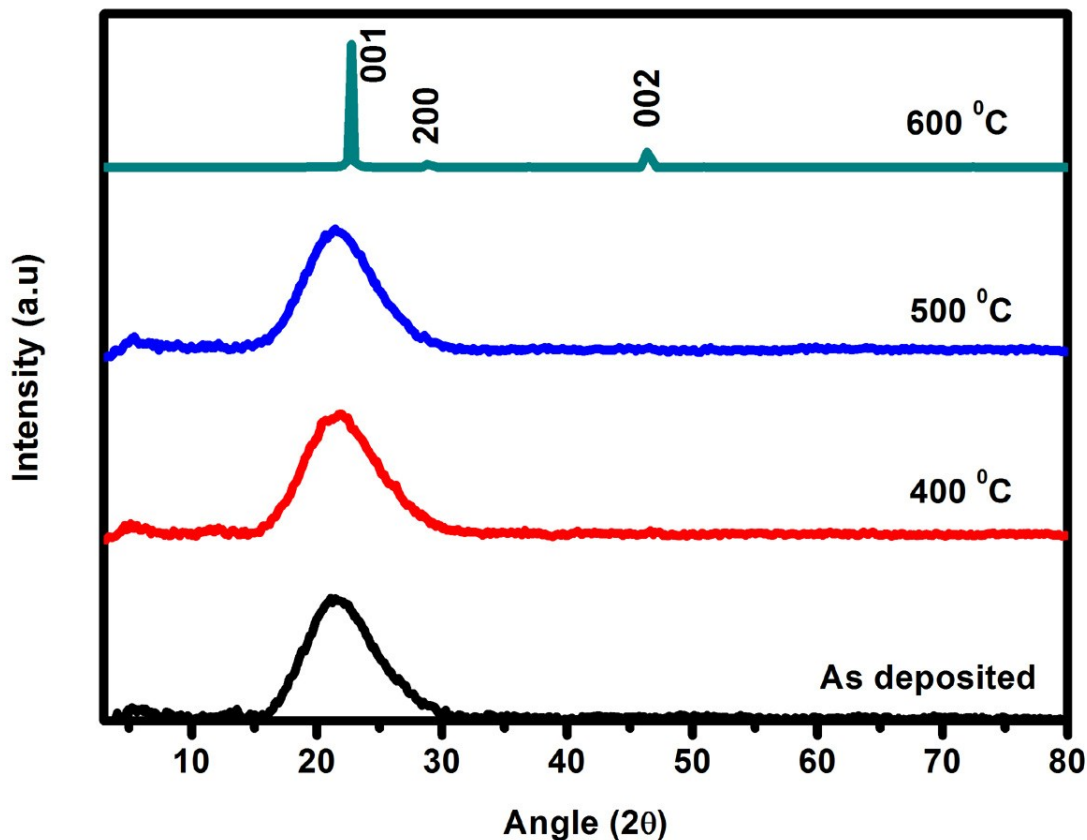

**Figure S1.** X-ray diffraction patterns of Nb<sub>2</sub>O<sub>5</sub> thin film deposited on quartz substrate and annealed at 400 °C, 500 °C, 600 °C for 1 h. Absence of any distinct peaks in the as deposited and films annealed at a temperature of 400 °C, 500 °C respectively shows the amorphous nature and film annealed at a temperature of 600 °C shows peaks corresponding to 2θ values at 22.61 °, 28.41 ° and 46.41° for the lattice reflection planes (001), (200), and (002) can be attributed to the orthorhombic phase (JCPDS card 30-0873) of Nb<sub>2</sub>O<sub>5</sub>.

#### **Preparation of Iodide/Triiodide liquid electrolyte**

15.9672g of 1-butyl-3 methyl imadasolium iodide, 1.3385g of lithium iodide, 6.7605g of 4-tert butyl 1 pyridine, 1.269g of iodine and 1.1816g of guanidium thiocyanate is dissolved in 100 ml acetonitrile and sonicated for 15 min.

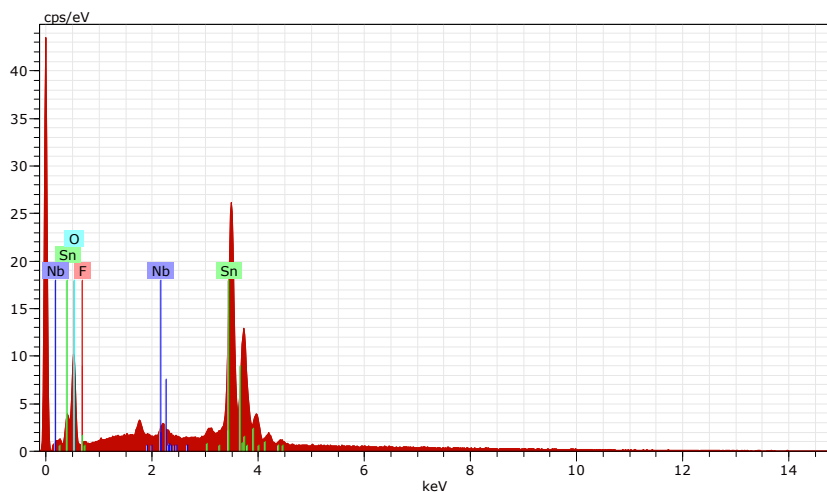

Acquisition 1904      Date:4/6/2015 11:39:57 AM      HV:15.0kV      Puls th.:17.98kcps

| El     | AN | Series   | unn. C [wt.%] | norm. C [wt.%] | Atom. C [at.%] | Error (1 Sigma) [wt.%] |
|--------|----|----------|---------------|----------------|----------------|------------------------|
| F      | 9  | K-series | 0.05          | 0.09           | 0.18           | 0.08                   |
| Sn     | 50 | L-series | 42.76         | 67.78          | 22.82          | 1.32                   |
| Nb     | 41 | L-series | 1.00          | 1.58           | 0.68           | 0.07                   |
| O      | 8  | K-series | 19.28         | 30.56          | 76.32          | 2.67                   |
| Total: |    |          | 63.09         | 100.00         | 100.00         |                        |

**Figure S2:** Energy dispersive X-ray spectrum (EDX) and mapping measurements of BL 11.

The peak position of Nb<sub>2</sub>O<sub>5</sub> can be seen along with other elements

**Spectroscopic Ellipsometric observation:** Nb<sub>2</sub>O<sub>5</sub> thin film deposited on a quartz substrate at a RF power of 150W for 30 minutes and one set is annealed at 600 °C. Classical model is used to fit the data and the films were considered as homogeneous thin film. The Ψ and Δ data were acquired at an angle of incidence 70° and the best fitted results are shown in the table

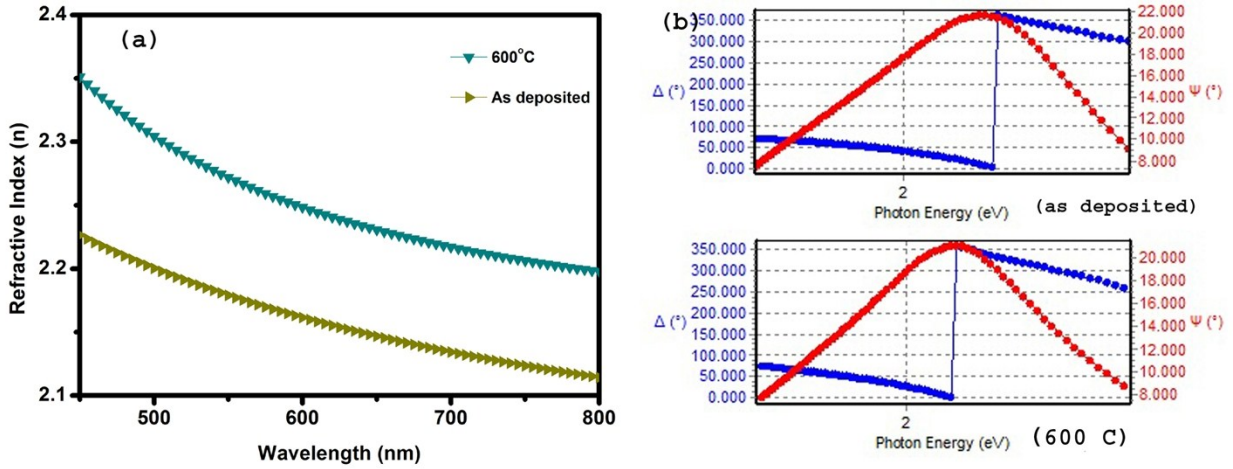

**Figure S3:** (a) shows the variation of refractive index (n) of the as deposited and annealed films as a function of wavelength. (b) is the experimental and fitted curves delta ( $\Delta$ ) and psi ( $\Psi$ ) from spectroscopic ellipsometry measurements.

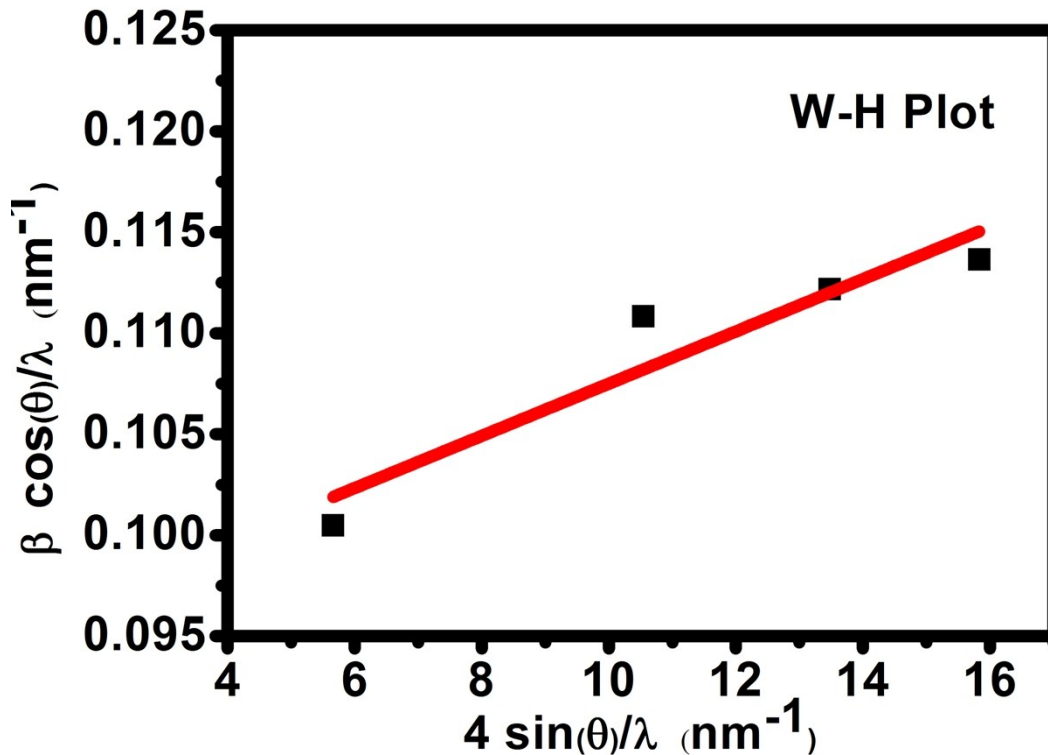

**Figure S4:** Williamson – Hall plot of TiO<sub>2</sub> nano particle. Crystallite size (D) is calculated from

the Williamson-Hall relation given as 
$$\frac{\beta_{2\theta \cos \theta}}{\lambda} = \frac{K}{D} + \frac{4\epsilon \sin \theta}{\lambda}$$

**Table 1:**

| Film         | $\chi^2$ | Thickness ( nm) | $n$ [632 nm] | $\epsilon_r$ |
|--------------|----------|-----------------|--------------|--------------|
| As deposited | 0.011    | 141.5 $\pm$ 0.8 | 2.15         | 4.63         |
| 600 °C       | 0.048    | 139.8 $\pm$ 1.9 | 2.23         | 5.00         |

**Table 2:** Cell impedance parameters from I-V characteristics The thickness of the BL is approximated by taking a deposition rate of 1 nm/min. at 100 W RF power.

| BL sputtering time | BL thickness (nm) | Series resistance<br>Rs ( $\Omega$ ) |             | Shunt resistance<br>Rsh ( $\Omega$ ) |             |
|--------------------|-------------------|--------------------------------------|-------------|--------------------------------------|-------------|
|                    |                   | amorphous                            | crystalline | amorphous                            | crystalline |
| 10 min.            | ~10 nm            | 32.65                                | 34.96       | 0.70                                 | 24451.71    |
| 20 min.            | ~20 nm            | 230.45                               | 37.13       | 0.55                                 | 39412.25    |
| 30 min.            | ~30 nm            | 71.60                                | 39.36       | 0.79                                 | 72459.10    |
| 40 min.            | ~40 nm            | 64.95                                | 32.95       | 0.75                                 | 33527.83    |
| 60 min.            | ~60 nm            | 380.66                               | 36.06       | 0.79                                 | 40690.10    |
| 80 min.            | ~80 nm            | 610.79                               | 42.75       | 0.50                                 | 62804.03    |

**Table 3:** Electron response time calculated from OCVD analysis.

| Electron response time ( $\tau_n$ ) (sec) at different decay potentials | Decay potential (Volts) | Sample code |        |       |       |
|-------------------------------------------------------------------------|-------------------------|-------------|--------|-------|-------|
|                                                                         |                         | 40          | 40A    | 80    | 80A   |
|                                                                         | 0.6                     | 0.769       | 0.1785 | 0.451 | 0.106 |
|                                                                         | 0.5                     | 4.139       | 0.383  | 2.21  | 0.141 |
|                                                                         | 0.4                     | 9.85        | 0.649  | 6.35  | 0.333 |
